# Supplementary material for: Combining multi-scale modelling methods to decipher molecular motions of a branching sucrase from glycoside-hydrolase family 70
Source: PLOS journal article supplement (doi:10.1371/journal.pone.0201323), 2018-08-01
Supplement: S1 (10.1371/journal.pone.0201323.s001) [file journal.pone.0201323.s001]

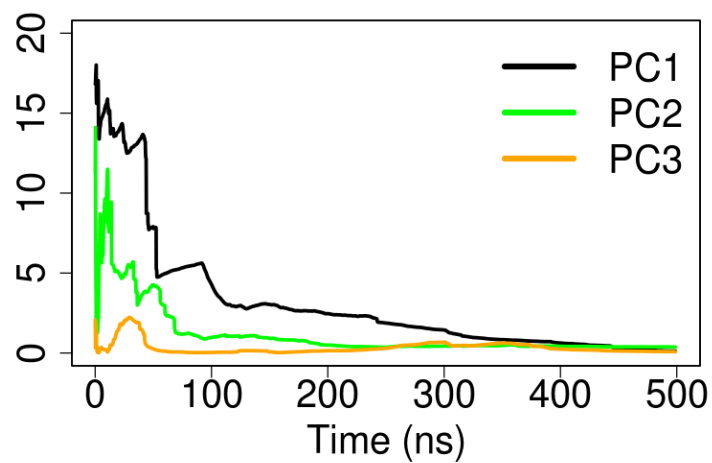

**S1 Fig. MD simulation Convergence.** Kullback-Leibler Divergence of Principal Component projection histograms was calculated from first (1 to 500ns) and second half (500ns to 1 $\mu$ s) of MD simulation trajectories vs time for the three first principal components (colored in black, yellow and orange, respectively).
