# Supplementary material for: Combining multi-scale modelling methods to decipher molecular motions of a branching sucrase from glycoside-hydrolase family 70
Source: PLOS journal article supplement (doi:10.1371/journal.pone.0201323), 2018-08-01
Supplement: S2 (10.1371/journal.pone.0201323.s002) [file journal.pone.0201323.s002]

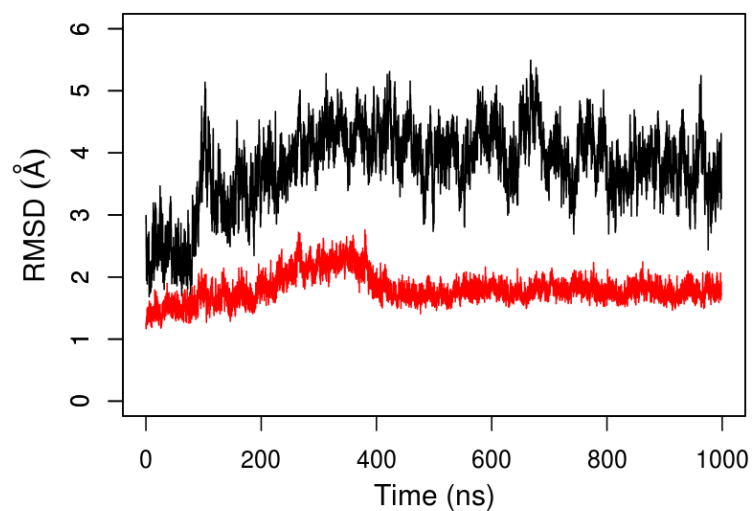

**S2 Fig. Quantitative measurement of  $\Delta N_{123}$ -GBD-CD2 MD conformational motions during MD simulation of 1 $\mu$ s carried out in water.** Heavy atom Root Mean Square Deviation of the whole enzyme (black line) and enzyme without domain V (red line) with respect to X-ray structure were calculated as function of simulation time.
