# Supplementary material for: Combining multi-scale modelling methods to decipher molecular motions of a branching sucrase from glycoside-hydrolase family 70
Source: PLOS journal article supplement (doi:10.1371/journal.pone.0201323), 2018-08-01
Supplement: S3 (10.1371/journal.pone.0201323.s003) [file journal.pone.0201323.s003]

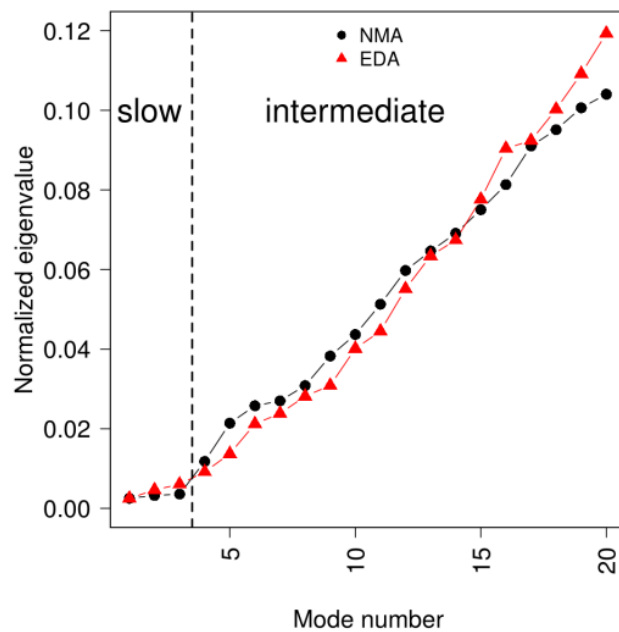

**S3 Fig. Normalized eigenvalues versus Mode number.** Eigenvalues of each mode were normalized over the total motion ( $\text{eigenvalue}_{(i)} / \sum_{n=1}^{i=1} \text{eigenvalue}$ ) and plotted against Mode number of NMA (black dots) and EDA (red triangles), respectively.
