# Supplementary material for: Combining multi-scale modelling methods to decipher molecular motions of a branching sucrase from glycoside-hydrolase family 70
Source: PLOS journal article supplement (doi:10.1371/journal.pone.0201323), 2018-08-01
Supplement: S4 (10.1371/journal.pone.0201323.s004) [file journal.pone.0201323.s004]

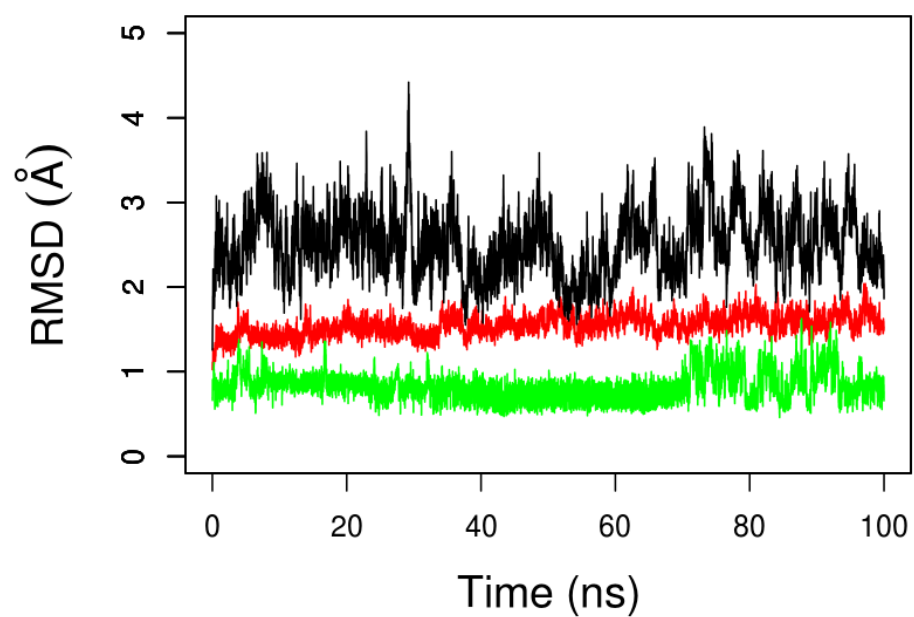

**S4 Fig. Quantitative measurement of  $\Delta N_{123}$ -GBD-CD2-sucrose complex MD conformational motions during MD simulation of 100ns carried out in water.** Heavy atoms Root Mean Square Deviation of the whole enzyme (black line), enzyme without domain V (red line) and sucrose (green line) with respect to X-ray structure were calculated as function of simulation time.
