# Supplementary material for: Combining multi-scale modelling methods to decipher molecular motions of a branching sucrase from glycoside-hydrolase family 70
Source: PLOS journal article supplement (doi:10.1371/journal.pone.0201323), 2018-08-01
Supplement: S7 (10.1371/journal.pone.0201323.s007) [file journal.pone.0201323.s007]

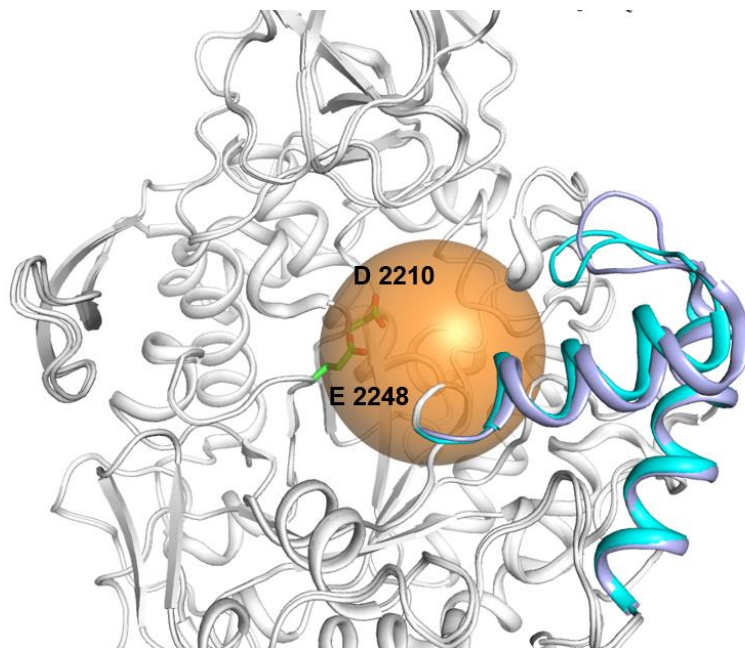

**S7 Fig. Superimposition of the two solved structures of  $\Delta N_{123}$ -GBD-CD2.** The helix-loop-helix motifs corresponding to residues 2324-2368 are highlighted in light blue (pdb entry: 3ttq) and cyan (pdb entry: 4ttu). The side chains in sticks represent the catalytic residues: the nucleophile D2210 and the acid base E2248. The orange sphere is shown for reference to locate the active site.
