# Supplementary material for: Combining multi-scale modelling methods to decipher molecular motions of a branching sucrase from glycoside-hydrolase family 70
Source: PLOS journal article supplement (doi:10.1371/journal.pone.0201323), 2018-08-01
Supplement: S8 (10.1371/journal.pone.0201323.s008) [file journal.pone.0201323.s008]

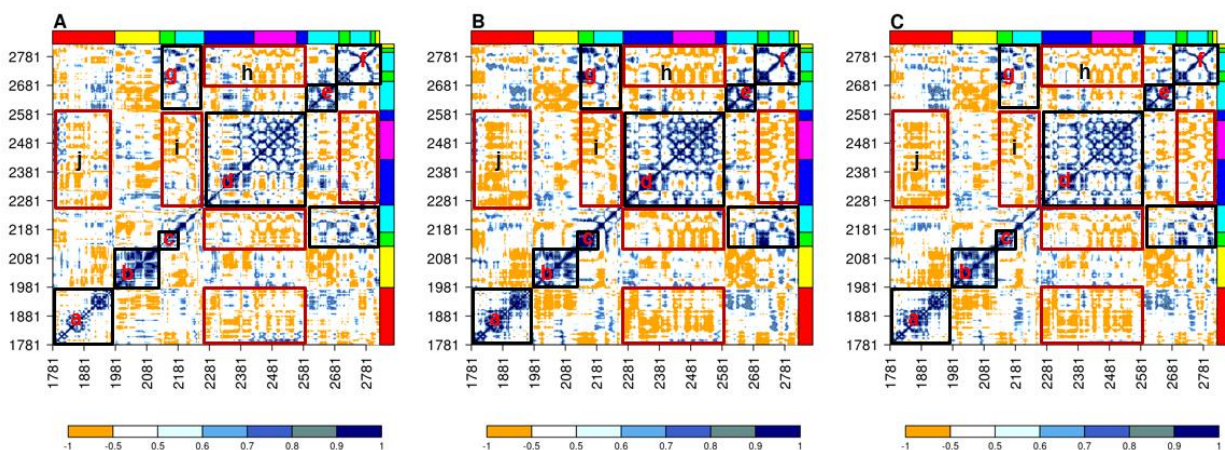

**S8 Fig. Dynamical inter-residue correlation map of  $\Delta N_{123}$ -GBD-CD2.** Maps were calculated from free ligand EDA (A), NMA (B), and from enzyme-sucrose complex EDA (C). The color scale from orange to blue corresponds to discrete correlation coefficient values (DCC) from -1.0 to +1.0. The structural domains of  $\Delta N_{123}$ -GBD-CD2 are shown using the same color code as in Fig 3B in the main text.
