# Supplementary material for: Combining multi-scale modelling methods to decipher molecular motions of a branching sucrase from glycoside-hydrolase family 70
Source: PLOS journal article supplement (doi:10.1371/journal.pone.0201323), 2018-08-01
Supplement: S10 (10.1371/journal.pone.0201323.s010) [file journal.pone.0201323.s010]

**S1 Table. List of ΔN123-GBD-CD2 X-ray structures available in the Protein Data Bank.**

| PBD entry | Resolution (Å) | Number of molecules in the asymmetric unit | Co-crystallized molecules                                                               |
|-----------|----------------|--------------------------------------------|-----------------------------------------------------------------------------------------|
| 3TTQ      | 1.9            | 1                                          | Ca <sup>2+</sup> , Na <sup>+</sup> , Glycerol and tetramethylene glycol                 |
| 3TTO      | 3.3            | 4                                          | Ca <sup>2+</sup> and Glycerol                                                           |
| 4TTU      | 2.2            | 1                                          | Ca <sup>2+</sup> , Na <sup>+</sup> , α-D-glucose and Di(hydroxyethyl)ether              |
| 4TVD      | 2.3            | 1                                          | Ca <sup>2+</sup> , Na <sup>+</sup> , α-D-glucose, β-D-glucose and Di(hydroxyethyl)ether |
| 4TVC      | 1.9            | 1                                          | Ca <sup>2+</sup> , Na <sup>+</sup> , α-D-glucose                                        |
